# Supplementary material
Source: PubMed Central journal article supplement (PMC7572893)
Supplement: NIHMS1630301-supplement-2.pdf [file NIHMS1630301-supplement-2.pdf]

## Peer Review Information

---

**Journal:** Nature Human Behaviour

**Manuscript Title:** State-level needs for social distancing and contact tracing to contain COVID-19 in the United States

**Corresponding author name(s):** Weihsueh A. Chiu & Martial L. Ndeffo-Mbah

### Editorial Notes:

**Transferred manuscripts** This manuscript has been previously reviewed at another journal that is not operating a transparent peer review scheme. This document only contains reviewer comments, rebuttal and decision letters for versions considered at Nature Human Behaviour.

### Reviewer Comments & Decisions:

|                                          |
|------------------------------------------|
| <b>Decision Letter, initial version:</b> |
|------------------------------------------|

14th September 2020

\*Please ensure you delete the link to your author homepage in this e-mail if you wish to forward it to your co-authors.

Dear Dr Ndeffo-Mbah,

Thank you once again for submitting your revised manuscript, entitled "State-level needs for social distancing and contact tracing to contain COVID-19 in the United States," and for your patience during the re-review process. I apologise once again for the time that this has taken.

Your manuscript has now been evaluated by our referees, and in the light of their advice I am delighted to say that we can in principle offer to publish it. Please note that while Reviewer 3 has not sent their comments, we consulted with Reviewer 2 who was positive about the revisions made in response to Reviewer 3's comments. We would like you to revise your paper to address the additional points made by Reviewer 2, which you will find below, and to ensure that it complies with our Guide to Authors at <http://www.nature.com/nathumbehav/info/gta>.

One of the main reasons for delays in formal acceptance is failure to fully comply with editorial policies and formatting requirements. To assist you with finalizing your manuscript for publication, I attach a checklist that lists all of our editorial policies and formatting requirements. I also attach a template document, which exemplifies our policies and formatting requirements.

Please attend to *every item* in the checklist and upload a copy of the completed checklist with your submission. I have highlighted in the checklist items that require your attention. I also mention here a few points that are frequently missed and can cause delays:

1) Ensure that all corresponding authors have linked their ORCID to their account on our online manuscript handling system. This is very frequently missed and invariably causes delays in formal acceptance.

2) Ensure that you provide all of the materials requested in the attached checklist and below with your final submission. Please note that the Licence to Publish needs to be hand-signed.

Nature Human Behaviour offers a transparent peer review option for new original research manuscripts submitted from 1st December 2019. We encourage increased transparency in peer review by publishing the reviewer comments, author rebuttal letters and editorial decision letters if the authors agree. Such peer review material is made available as a supplementary peer review file.

**Please state in the cover letter 'I wish to participate in transparent peer review' if you want to opt in, or 'I do not wish to participate in transparent peer review' if you don't.** Failure to state your preference will result in delays in accepting your manuscript for publication.

Please note: we allow redactions to authors' rebuttal and reviewer comments in the interest of confidentiality. If you are concerned about the release of confidential data, please let us know specifically what information you would like to have removed. Please note that we cannot incorporate redactions for any other reasons. Reviewer names will be published in the peer review files if the reviewer signed the comments to authors, or if reviewers explicitly agree to release their name. For more information, please refer to our [FAQ page](https://www.nature.com/documents/nr-transparent-peer-review.pdf).

We hope to hear from you within 10 days; please let us know if the revision process is likely to take longer.

To submit your revised manuscript, you will need to provide the following:

- Cover letter
- Point-by-point response to the reviewers (if applicable)
- Manuscript text (not including the figures) in .docx or .tex format
- Individual figure files (one figure per file)
- Extended Data & Supplementary Information, as instructed
- Reporting summary
- Editorial policy checklist
- License to publish
- Third-party rights table (if applicable)
- Suggestions for cover illustrations (if desired)

Consortia authorship:

For papers containing one or more consortia, all members of the consortium who contributed to the paper must be listed in the paper (i.e., print/online PDF). If necessary, individual authors can be listed in both the main author list and as a member of a consortium listed at the end of the paper. When submitting your revised manuscript via the online submission system, the consortium name should be entered as an author, together with the contact details of a nominated consortium representative. See

<https://www.nature.com/authors/policies/authorship.html> for our authorship policy and <https://www.nature.com/documents/nr-consortia-formatting.pdf> for further consortia formatting guidelines, which should be adhered to prior to acceptance.

Reviewer Recognition:

In recognition of the time and expertise our reviewers provide to Nature Human Behaviour's editorial process, we would like to formally acknowledge their contribution to the external peer review of your manuscript entitled "State-level needs for social distancing and contact tracing to contain COVID-19 in the United States". For those reviewers who give their assent, we will be publishing their names alongside the published article.

Please use the following link for uploading these materials:

**[REDACTED]**

If you have any further questions, please feel free to contact me.

With best regards,

Charlotte Payne  
Editor  
Nature Human Behaviour

Reviewer #2:

Remarks to the Author:

Thanks very nice for the careful response to our edits.

A few suggestions:

page 5 line 3 and 4: I can't see  $>1$  and  $<1$  besides the Reff? Maybe its just my Word software though?

page 16 last line: publically --> publicly ?

page 17, Reff(t) equation: I think they could explain this in words, and where the relative contributions come from? I think this would help for a more general reader that is not as familiar with these definitions (but this is just a personal preference).

Reviewer #3:

None

**Author Rebuttal to Initial comments**

Dear Reviewer,

We are grateful for all the constructive comments and suggestions and have now thoroughly revised our manuscript to address them. Below, you will find a point-by-point response to your comments. In addition we have provided a revised version of our manuscript with all major changes highlighted.

We hope to have satisfactorily addressed your comments and that you will now find the manuscript suitable for publication.

Thank you in advance,

Martial Ndeffo, PhD

-----

Reviewer #2:

Remarks to the Author:

Thanks very nice for the careful response to our edits.

A few suggestions:

page 5 line 3 and 4: I can't see >1 and <1 besides the Ref? Maybe it's just my Word software though?

***RESPONSE: We have corrected the typo***

page 16 last line: publically --> publicly ?

***RESPONSE: We have corrected the typo***

page 17, Reff(t) equation: I think they could explain this in words, and where the relative contributions come from? I think this would help for a more general reader that is not as familiar with these definitions (but this is just a personal preference).

**RESPONSE: We have now added an explanation in words and described where the relative contributions come from**

**Final Decision Letter:**

Dear Dr Ndeffo-Mbah,

We are pleased to inform you that your Article "State-level needs for social distancing and contact tracing to contain COVID-19 in the United States", has now been accepted for publication in Nature Human Behaviour. Thank you so much for your patience during the review process.

Before your manuscript is typeset, we will edit the text to ensure it is intelligible to our wide readership and conforms to house style. We look particularly carefully at the titles of all papers to ensure that they are relatively brief and understandable.

The subeditor may send you the edited text for your approval. Once your manuscript is typeset you will receive a link to your electronic proof via email within 20 working days, with a request to make any corrections within 48 hours. If you have queries at any point during the production process then please contact the production team at [rjsproduction@springernature.com](mailto:rjsproduction@springernature.com). Once your paper has been scheduled for online publication, the Nature press office will be in touch to confirm the details.

Acceptance of your manuscript is conditional on all authors' agreement with our publication policies (see <http://www.nature.com/nathumbehav/info/gta>). In particular your manuscript must not be published elsewhere and there must be no announcement of the work to any media outlet until the publication date (the day on which it is uploaded onto our web site).

The Author's Accepted Manuscript (the accepted version of the manuscript as submitted by the author) may only be posted 6 months after the paper is published, consistent with our [self-archiving embargo](http://www.nature.com/authors/policies/license.html). Please note that the Author's Accepted Manuscript may not be released under a Creative Commons license. For Nature Research Terms of Reuse of archived manuscripts please see: <http://www.nature.com/authors/policies/license.html#terms>

If you have posted a preprint on any preprint server, please ensure that the preprint details are updated with a publication reference, including the DOI and a URL to the published version of the article on the journal website.

An online order form for reprints of your paper is available at [http://www.nature.com/reprints](#)

<https://www.nature.com/reprints/author-reprints.html>><https://www.nature.com/reprints/author-reprints.html></a>. All co-authors, authors' institutions and authors' funding agencies can order reprints using the form appropriate to their geographical region.

We welcome the submission of potential cover material (including a short caption of around 40 words) related to your manuscript; suggestions should be sent to Nature Human Behaviour as electronic files (the image should be 300 dpi at 210 x 297 mm in either TIFF or JPEG format). Please note that such pictures should be selected more for their aesthetic appeal than for their scientific content, and that colour images work better than black and white or grayscale images. Please do not try to design a cover with the Nature Human Behaviour logo etc., and please do not submit composites of images related to your work. I am sure you will understand that we cannot make any promise as to whether any of your suggestions might be selected for the cover of the journal.

You can now use a single sign-on for all your accounts, view the status of all your manuscript submissions and reviews, access usage statistics for your published articles and download a record of your refereeing activity for the Nature journals.

To assist our authors in disseminating their research to the broader community, our SharedIt initiative provides you with a unique shareable link that will allow anyone (with or without a subscription) to read the published article. Recipients of the link with a subscription will also be able to download and print the PDF.

As soon as your article is published, you will receive an automated email with your shareable link.

We look forward to publishing your paper.

With best regards,

Charlotte Payne  
Editor  
Nature Human Behaviour

P.S. Click on the following link if you would like to recommend Nature Human Behaviour to your librarian <http://www.nature.com/subscriptions/recommend.html#forms>

\*\* Visit the Springer Nature Editorial and Publishing website at [http://editorial-jobs.springernature.com?utm\\_source=ejp\\_NHumB\\_email&utm\\_medium=ejp\\_NHumB\\_email&utm\\_campaign=ejp\\_NHumB](http://editorial-jobs.springernature.com?utm_source=ejp_NHumB_email&utm_medium=ejp_NHumB_email&utm_campaign=ejp_NHumB)>[www.springernature.com/editorial-and-publishing-jobs](http://www.springernature.com/editorial-and-publishing-jobs)</a> for more information about our career opportunities. If you have any questions please click [here](mailto:editorial.publishing.jobs@springernature.com)</a>. \*\*
